# Supplementary material for: Porcine Decellularized Diaphragm Hydrogel: A New Option for Skeletal Muscle Malformations
Source: MDPI journal article supplement (doi:10.3390/biomedicines9070709), 2021-06-22
Supplement: s1 [file s1]

## Supplementary Materials

### Porcine decellularized diaphragm hydrogel: a new option for muscle malformations

Daniele Boso, Eugenia Carraro, Edoardo Maghin, Silvia Todros, Arben Dedja, Monica Giomo, Nicola Elvassore, Paolo De Coppi, Piero Giovanni Pavan, Martina Piccoli\*

**Figure S1. Muscle-specific proteins in decellularized samples.**

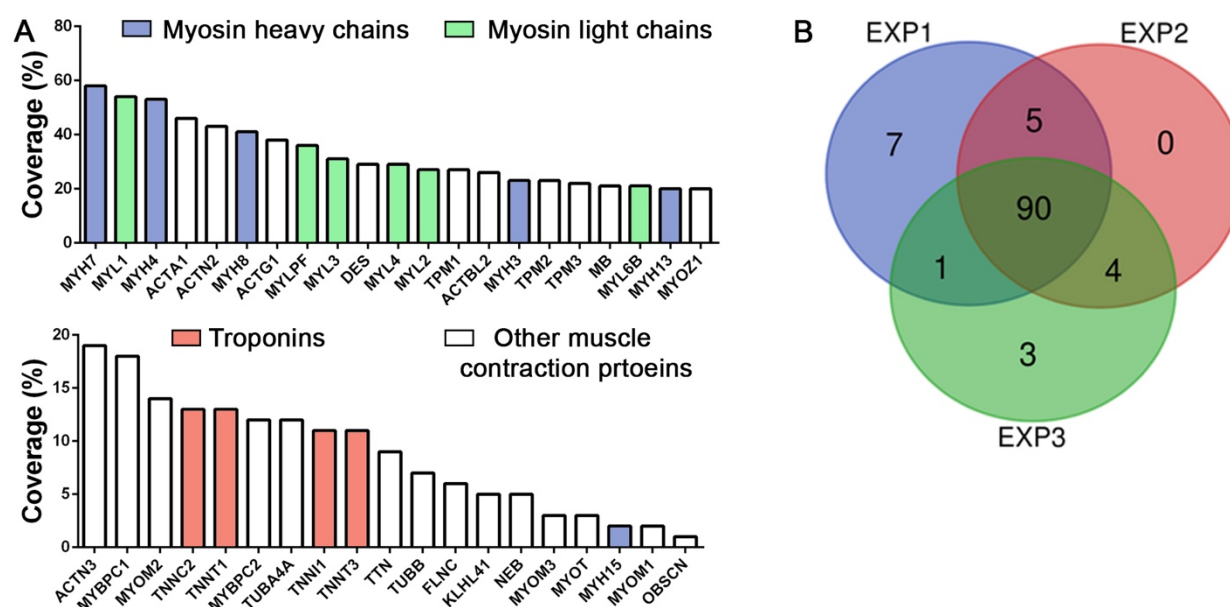

**A.** Percentage of coverage of specific muscle contraction proteins detected in decellularized samples. Highlighted with colors different isoforms of the same protein. **B.** Venn diagram showing the overlapping of detected proteins among triplicates of three different analyzed samples (EXP = experiment).

**Figure S2. 2% w/v dECM-derived hydrogel characterization.**

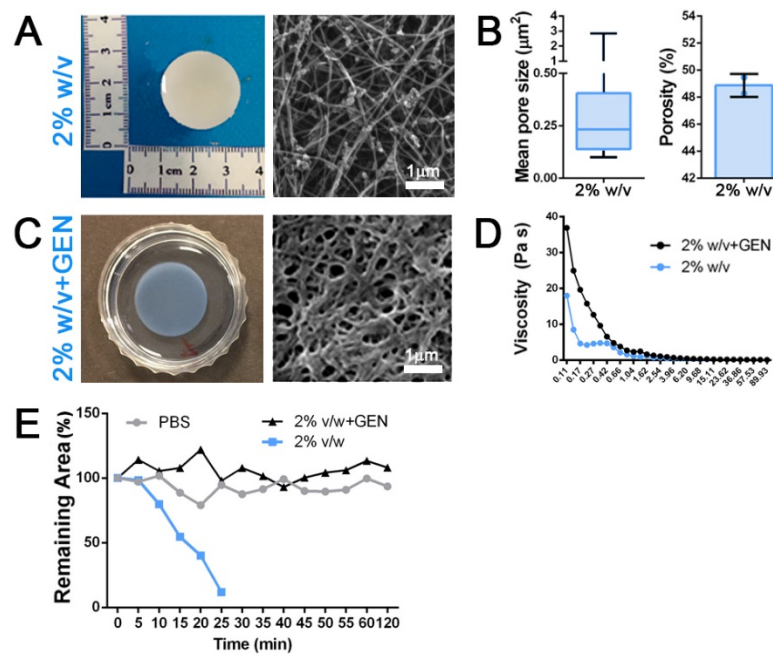

**A.** Gross appearance and ultrastructure of 2% w/v hydrogels. **B.** Mean pore size and porosity of 2% w/v hydrogels. **C.** Gross appearance and ultrastructure of 2% w/v hydrogels after crosslinking with genipin (+GEN). **D.** Viscoelastic properties under shear stress of 2% w/v hydrogels with and without genipin crosslinking. **E.** Degradation assay of 2% w/v hydrogels with and without genipin crosslinking using collagenase II. PBS: 2% w/v hydrogels without genipin and incubated with PBS (no collagenase II).

**Figure S3. Preparation and analysis of crosslinked 3% w/v dECM-derived hydrogel application in ex vivo CDH model.**

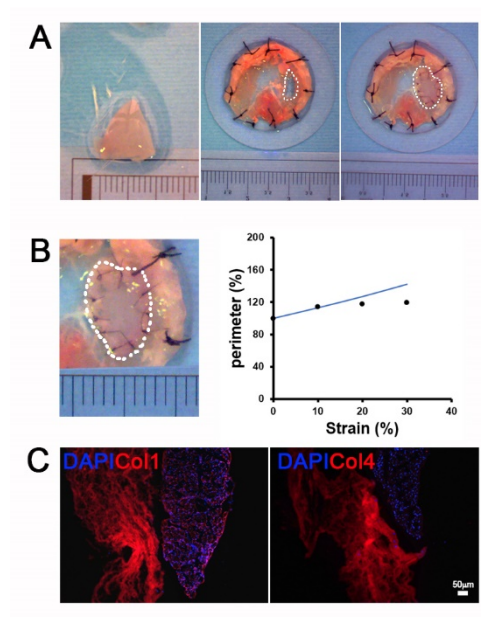

**A.** Gross appearance of crosslinked 3% w/v hydrogel patch (left panel), diaphragm defect (middle panel) and sutured patch on the defect (right panel). **B.** Calculated perimeter increasing during continuous stimulation up to 30% strain. Dots represent experimental results and solid curve is obtained from FE analysis. **C.** Immunofluorescence staining for the detection of Col1 and Col4 in crosslinked patches and damaged diaphragms after continuous mechanical stimulation.

**Figure S4. In vitro hydrogel biocompatibility.**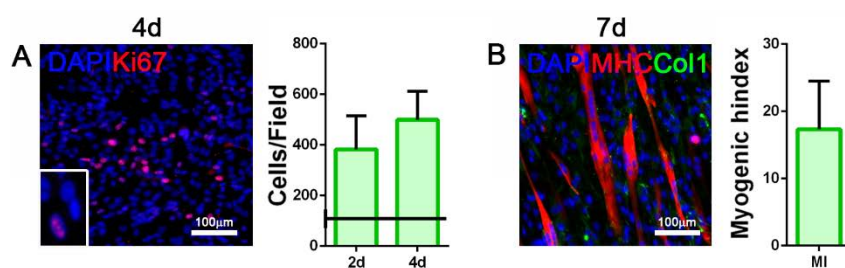

**A.** 2D culture of mixed hSKMC and hFb population after well coating with dECM-derived hydrogel. Quantification of cell growth (black line = number of seeded cells) after 2 and 4 days of culture. Proliferation marker (Ki67) in red. **B.** Differentiation of seeded cells and quantification of myogenic potential with calculation of myogenic index. Myosin heavy chain (MHC) in red; collagen 1 (Col1) in green. Nuclei are counterstained with DAPI (blue).

**Table S1.** List of proteins found in dECM with mass spectrometry.

| Accession  | Description                                               | GENE    | Coverage<br>[%] | Peptides<br>[#] |
|------------|-----------------------------------------------------------|---------|-----------------|-----------------|
| A0A5G2R3E4 | Acyl-CoA dehydrogenase<br>very long chain                 | ACADVL  | 5               | 2               |
| P16276     | Aconitate hydratase                                       | ACO2    | 10              | 5               |
| A0A5S6G831 | Actin, alpha skeletal muscle                              | ACTA1   | 46              | 14              |
| A0A287A4R1 | Actin beta like 2                                         | ACTBL2  | 26              | 6               |
| A0A287AA77 | Actin Gamma 1                                             | ACTG1   | 38              | 11              |
| F1RHL9     | Alpha-actinin-2 isoform 1                                 | ACTN2   | 43              | 31              |
| A0A5G2RET9 | Actinin Alpha 3                                           | ACTN3   | 19              | 15              |
| A0A286ZQ79 | Adenylate kinase<br>isoenzyme 1                           | AK1     | 10              | 2               |
| A0A287BFY0 | Fructose-bisphosphate aldolase                            | ALDOA   | 29              | 9               |
| A0A287B8Z2 | Fructose-bisphosphate aldolase                            | ALDOC   | 12              | 3               |
| A0A286ZJV6 | Annexin                                                   | ANXA2   | 8               | 2               |
| A0A287B5C0 | CMP/dCMP-type deami-<br>nase domain-containing<br>protein | APOBEC2 | 20              | 2               |
| A0A5G2R940 | Calcium-transporting<br>ATPase                            | ATP2A1  | 27              | 21              |
| P11607     | Sarcoplasmic/endoplasmic<br>reticulum calcium ATPase 2    | ATP2A2  | 19              | 16              |
| A0A287BBS4 | ATP synthase subunit alpha                                | ATP5F1A | 32              | 13              |
| K7GLT8     | ATP synthase subunit beta                                 | ATP5F1B | 38              | 14              |
| A0A287AHM1 | ATP synthase subunit<br>gamma                             | ATP5F1C | 15              | 4               |

|            |                                                   |        |    |    |
|------------|---------------------------------------------------|--------|----|----|
| Q9GKQ6     | biglycan                                          | BGN    | 5  | 2  |
| Q5S1S4     | Carbonic anhydrase 3                              | CA3    | 27 | 6  |
| F1RJW7     | Calsequestrin                                     | CASQ1  | 13 | 3  |
| Q5XLD3     | Creatine kinase M-type                            | CKM    | 11 | 3  |
| A0A286ZQI3 | Creatine kinase                                   | CKMT2  | 15 | 5  |
| A0A5G2QQE9 | Collagen alpha-1(I) chain                         | COL1A1 | 39 | 34 |
| F1SFA7     | Collagen alpha-2(I) chain                         | COL1A2 | 38 | 23 |
| A0A286ZWS8 | Collagen alpha-1(II) chain                        | COL2A1 | 12 | 9  |
| A0A286ZQ85 | Collagen alpha-1(III) chain                       | COL3A1 | 17 | 15 |
| A0A5G2QW87 | Uncharacterized protein                           | COL6A1 | 10 | 6  |
| I3LQ84     | Collagen alpha-2(VI)<br>chain                     | COL6A2 | 4  | 2  |
| I3LUR7     | Collagen alpha-3(VI)<br>chain                     | COL6A3 | 4  | 7  |
| F1S902     | Cartilage oligomeric matrix<br>protein            | COMP   | 7  | 3  |
| A0A287ATJ4 | Alpha(B)-crystallin                               | CRYAB  | 32 | 7  |
| P02540     | Desmin                                            | DES    | 29 | 10 |
| A0A286ZNV2 | Elongation factor 1-alpha 2                       | EEF1A2 | 19 | 7  |
| I3LIH3     | Tr-type G domain-contain-<br>ing protein          | EEF2   | 3  | 2  |
| Q1KYT0     | Beta-enolase                                      | ENO3   | 34 | 8  |
| A0A286ZRJ3 | Electron transfer flavopro-<br>tein subunit alpha | ETFPA  | 8  | 2  |
| A0A287AAL6 | four and a half LIM do-<br>mains 1                | FHL1   | 24 | 9  |
| F1SMN5     | Filamin-C isoform X4                              | FLNC   | 6  | 10 |
| F1S6B5     | Fibromodulin                                      | FMOD   | 9  | 3  |

|            |                                          |              |    |    |
|------------|------------------------------------------|--------------|----|----|
| F1SS24     | Fibronectin                              | FN1          | 8  | 12 |
| A0A287BG23 | Glyceraldehyde-3-phosphate dehydrogenase | GAPDH        | 40 | 8  |
| F1RM74     | Glyceraldehyde-3-phosphate dehydrogenase | GAPDHS       | 11 | 3  |
| A0A287BH33 | Aspartate aminotransferase               | GOT2         | 18 | 5  |
| A0A5G2QML3 | Histone H2B                              | H1-3         | 8  | 2  |
| P00348     | Hydroxyacyl-coenzyme A dehydrogenase     | HADH         | 13 | 2  |
| Q29554     | Trifunctional enzyme subunit alpha       | HADHA        | 5  | 2  |
| F1SDN2     | Acetyl-CoA Acyltransferase               | HADHB        | 6  | 3  |
| A0A5G2QRW3 | Hemoglobin subunit beta                  | HBB          | 33 | 7  |
| F1RII6     | Hemoglobin subunit epsilon               | HBE1         | 18 | 2  |
| A0A5S6G3Y8 | Heat shock 27 kDa protein                | HSPB1        | 12 | 4  |
| A0A287AQR8 | SHSP domain-containing protein           | HSPB6        | 36 | 4  |
| A0A286ZYE6 | Isocitrate dehydrogenase                 | IDH2         | 25 | 9  |
| A0A287AIE4 | Kelch Like Family Member 41              | KLHL41       | 5  | 2  |
| F1S911     | 60S ribosomal protein L40                | KXD1         | 8  | 2  |
| A0A286ZXT7 | L-lactate dehydrogenase                  | LDHA         | 25 | 8  |
| F1SR05     | L-lactate dehydrogenase                  | LDHB         | 7  | 2  |
| F1RGX4     | GLOBIN domain-containing protein         | LOC100737768 | 54 | 4  |
| F1SCU3     | Matrilin 3                               | MATN3        | 5  | 2  |
| P02189     | Myoglobin                                | MB           | 21 | 3  |
| A0A5G2RGL7 | Malate dehydrogenase                     | MDH2         | 34 | 9  |

|            |                                                            |        |    |     |
|------------|------------------------------------------------------------|--------|----|-----|
| A0A287B5J2 | Myosin Binding Protein C1                                  | MYBPC1 | 18 | 17  |
| A0A5G2QJC1 | Myosin binding protein C2                                  | MYBPC2 | 12 | 12  |
| F1SS66     | Myosin heavy chain 13                                      | MYH13  | 20 | 41  |
| I3L675     | Myosin Heavy Chain 15                                      | MYH15  | 2  | 5   |
| A0A5G2QTZ6 | Muscle Embryonic Myosin Heavy Chain                        | MYH3   | 23 | 53  |
| Q9TV62     | Myosin-4                                                   | MYH4   | 53 | 109 |
| P79293     | Myosin-7                                                   | MYH7   | 58 | 115 |
| A0A5G2R196 | Myosin-2                                                   | MYH8   | 41 | 83  |
| A0A286ZVM3 | Myosin light chain 1                                       | MYL1   | 54 | 9   |
| Q8MHY0     | myosin regulatory light chain 2                            | MYL2   | 27 | 3   |
| F1SNW4     | Myosin light chain 3                                       | MYL3   | 31 | 5   |
| F1RRT2     | Myosin light chain 4                                       | MYL4   | 29 | 3   |
| A0A5G2QUW6 | Myosin Light Chain 6B                                      | MYL6B  | 21 | 5   |
| A0A5G2R327 | Myosin light chain, phosphorylatable, fast skeletal muscle | MYL6B  | 36 | 6   |
| A0A480KXA1 | Myomesin-1 isoform a                                       | MYOM1  | 2  | 3   |
| A0A286ZK06 | Myomesin 2                                                 | MYOM2  | 14 | 8   |
| A0A287ANE3 | Myomesin 3                                                 | MYOM3  | 3  | 3   |
| A0A287AJY7 | Myotilin                                                   | MYOT   | 3  | 2   |
| Q4PS85     | Myozenin-1                                                 | MYOZ1  | 20 | 3   |
| A0A287BN18 | Nebulin                                                    | NEB    | 5  | 20  |
| A0A287AQG1 | Proton-translocating NAD(P)(+) transhydrogenase            | NNT    | 4  | 3   |

|            |                                     |         |    |    |
|------------|-------------------------------------|---------|----|----|
| A0A5G2QZ79 | Obscurin, Myosin Light Chain Kinase | OBSCN   | 1  | 2  |
| A0A286ZIJ9 | ATP-dependent 6-phosphofructokinase | PFKM    | 8  | 5  |
| B5KJG2     | Phosphoglycerate mutase 1           | PGAM2   | 9  | 3  |
| F1RPH0     | Phosphoglycerate kinase             | PGK1    | 8  | 2  |
| A0A287A7R4 | Pyruvate Kinase M1/2                | PKM     | 11 | 9  |
| A0A287B9H1 | Plectin                             | PLEC    | 2  | 4  |
| A0A287AT94 | Alpha-1,4 glucan phosphorylase      | PYGB    | 9  | 6  |
| A0A287B6I2 | Alpha-1,4 glucan phosphorylase      | PYGM    | 23 | 28 |
| P16960     | Ryanodine receptor 1                | RYR1    | 1  | 2  |
| A0A287BGP7 | Solute carrier family 25 member 3   | SLC25A3 | 6  | 2  |
| A0A286ZIE8 | Solute carrier family 25 member 4   | SLC25A4 | 24 | 5  |
| P20112     | Sparc                               | SPARC   | 8  | 3  |
| F1RK48     | Sarcalumenin isoform X1             | SRL     | 7  | 4  |
| F1SNZ7     | Succinate--CoA ligase               | SUCLG1  | 6  | 2  |
| P02587     | Troponin C, skeletal muscle         | TNNC2   | 13 | 2  |
| A0A286ZI93 | Troponin I                          | TNNI1   | 11 | 2  |
| A0A5G2R687 | Troponin T, slow skeletal muscle    | TNNT1   | 13 | 3  |
| A0A5S6I3K1 | Troponin T, fast skeletal muscle    | TNNT3   | 11 | 3  |
| A0A287BHM1 | Tropomyosin alpha-1 chain           | TPM1    | 27 | 10 |
| A0A287AN33 | Tropomyosin 2                       | TPM2    | 23 | 10 |

|            |                                                         |        |    |   |
|------------|---------------------------------------------------------|--------|----|---|
| A0A287BDL6 | Tropomyosin alpha-3 chain                               | TPM3   | 22 | 8 |
| A0A5G2QM05 | Titin                                                   | TTN    | 9  | 4 |
| A0A5G2R655 | Tubulin alpha 4a                                        | TUBA4A | 12 | 5 |
| F2Z5B2     | Tubulin beta chain                                      | TUBB   | 7  | 2 |
| F1RPD2     | Cytochrome b-c1 complex<br>subunit 2, mitochondrial     | UQCRC2 | 9  | 2 |
| A0A5S6HVC8 | Voltage-dependent anion-<br>selective channel protein 1 | VDAC1  | 22 | 6 |
| Q9MZ15     | Voltage-dependent anion-<br>selective channel protein 2 | VDAC2  | 10 | 2 |
| A0A5G2QH97 | Voltage-dependent anion-<br>selective channel protein 3 | VDAC3  | 19 | 5 |
| A0A5S6H025 | Vimentin                                                | VIM    | 5  | 2 |

**Table S2.** List of primary and secondary antibodies used.

| Name                               | Source        | Dilution |
|------------------------------------|---------------|----------|
| Laminin                            | Sigma-Aldrich | 1:200    |
| Phalloidin (F-actin)               | Abcam         | 1:1000   |
| Col1                               | Abcam         | 1:100    |
| Col4                               | Abcam         | 1:200    |
| Ki67                               | Abcam         | 1:100    |
| MHC                                | R&D Systems   | 1:50     |
| Anti rabbit IgG<br>(H+L)-Alexa 594 | Invitrogen    | 1:200    |
| Anti mouse IgG<br>(H+L)-Alexa 594  | Invitrogen    | 1:200    |
| Anti mouse IgG<br>(H+L)-Alexa 548  | Invitrogen    | 1:200    |
